# Supplementary material for: Positive tipping points for accelerating adoption of regenerative practices in African smallholder farming systems: What sustains adoption?
Source: Copernicus journal article supplement (doi:10.5194/egusphere-2023-2531), 2023-11-28
Supplement: Supplementary file [file egusphere-2023-2531-AC2-supplement.pdf]

Revised Manuscript structure

| <b>Structure before revision</b>                                                                                                                                                                                                                                                                                                                                                                                                                                                                                                                                                                                                           | <b>Revised structure</b>                                                                                                                                                                                                                                                                                                                                                                                                                                                                                                                  |
|--------------------------------------------------------------------------------------------------------------------------------------------------------------------------------------------------------------------------------------------------------------------------------------------------------------------------------------------------------------------------------------------------------------------------------------------------------------------------------------------------------------------------------------------------------------------------------------------------------------------------------------------|-------------------------------------------------------------------------------------------------------------------------------------------------------------------------------------------------------------------------------------------------------------------------------------------------------------------------------------------------------------------------------------------------------------------------------------------------------------------------------------------------------------------------------------------|
| <ol style="list-style-type: none"> <li>1. Abstract</li> <li>2. Introduction</li> <li>3. Enabling conditions for successful adoption of RA in Africa</li> <li>4. Reinforcing feedback processes in adoption of RA</li> <li>5. A case study of The International Small group and Tree planting programme (TIST) in East Africa</li> <li>6. Scaling of TIST</li> <li>7. How is TIST meeting the enabling conditions for enrolment in its sites?</li> <li>8. Reinforcing feedback processes driving adoption of TIST</li> <li>9. What does the TIST Scaling pattern tell us about accelerating RA adoption?</li> <li>10. Conclusion</li> </ol> | <ol style="list-style-type: none"> <li>1. Abstract</li> <li>2. Introduction</li> <li>3. Conceptual framing</li> <li>4. Enabling conditions and feedback processes for successful adoption of RA in Africa</li> <li>5. A case study of the International Small Group and Tree planting Programme (TIST) in East Africa</li> <li>6. Enabling conditions and reinforcing feedback processes in the scaling of TIST</li> <li>7. What does the TIST scaling pattern tells us about accelerating RA adoption?</li> <li>8. Conclusion</li> </ol> |
